# Supplementary material
Source: PubMed Central journal article supplement (PMC7556542)
Supplement: bm0c00904_si_001.pdf [file bm0c00904_si_001.pdf]

# Supporting Information

## Exploring the potential of benzene-1,3,5-tricarboxamide supramolecular polymers as biomaterials

*Silvia Varela-Aramburu,<sup>‡,†,§</sup> Giulia Morgese,<sup>‡,†,§</sup> Lu Su,<sup>†,§</sup> Sandra M.C. Schoenmakers,<sup>†,§</sup> Mattia Perrone,<sup>||</sup> Luigi Leanza,<sup>||</sup> Claudio Perego,<sup>#</sup> Giovanni M. Pavan<sup>\*,||,#</sup> Anja R. A. Palmans,<sup>\*,†,§</sup> E. W. Meijer<sup>\*,†,§</sup>*

<sup>†</sup>Laboratory of Macromolecular and Organic Chemistry, Eindhoven University of Technology, P.O. Box 513, 5600 MB Eindhoven, The Netherlands

<sup>§</sup>Institute for Complex Molecular Systems, Eindhoven University of Technology, P. O. Box 513, 5600 MB Eindhoven, The Netherlands

<sup>||</sup>Department of Applied Science and Technology, Politecnico di Torino, Corso Duca degli Abruzzi 24, 10129 Torino, Italy

<sup>#</sup>Department of Innovative Technologies, University of Applied Sciences and Arts of Southern Switzerland, Galleria 2, Via Cantonale 2c, 6928 Manno, Switzerland

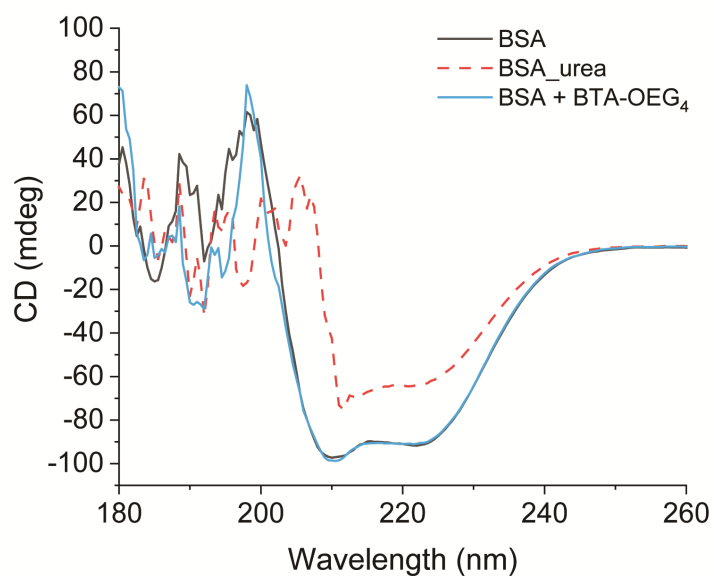

**Figure S1.** CD spectrum of **BTA-OEG<sub>4</sub>** incubated with BSA compared with native BSA and BSA denatured by urea.

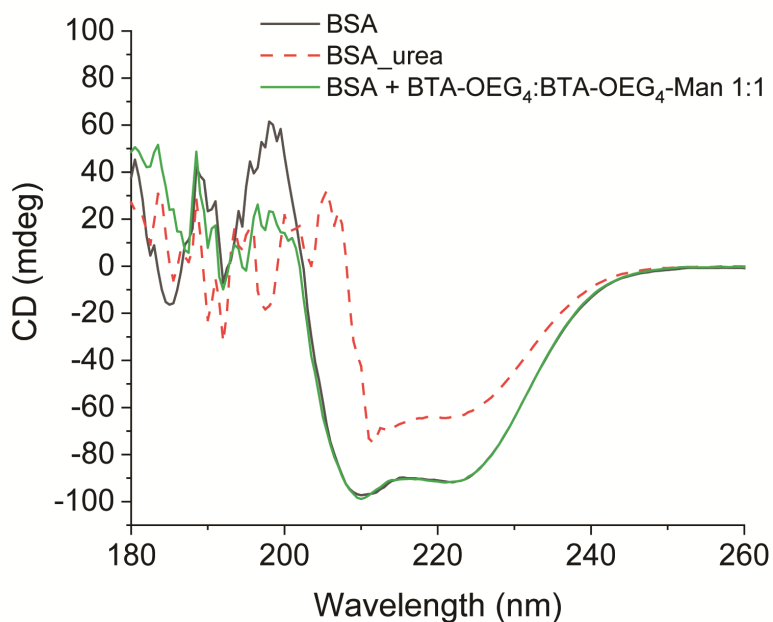

**Figure S2.** CD spectrum of **BTA-OEG<sub>4</sub>-Man/ BTA-OEG<sub>4</sub>** incubated with BSA compared with native BSA and BSA denatured by urea.

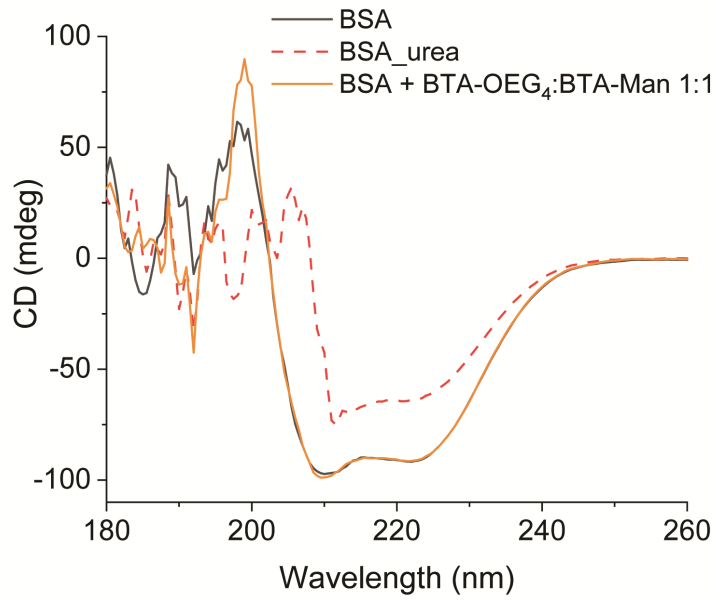

**Figure S3.** CD spectrum of **BTA-Man/ BTA-OEG<sub>4</sub>** incubated with BSA compared with native BSA and BSA denatured by urea.

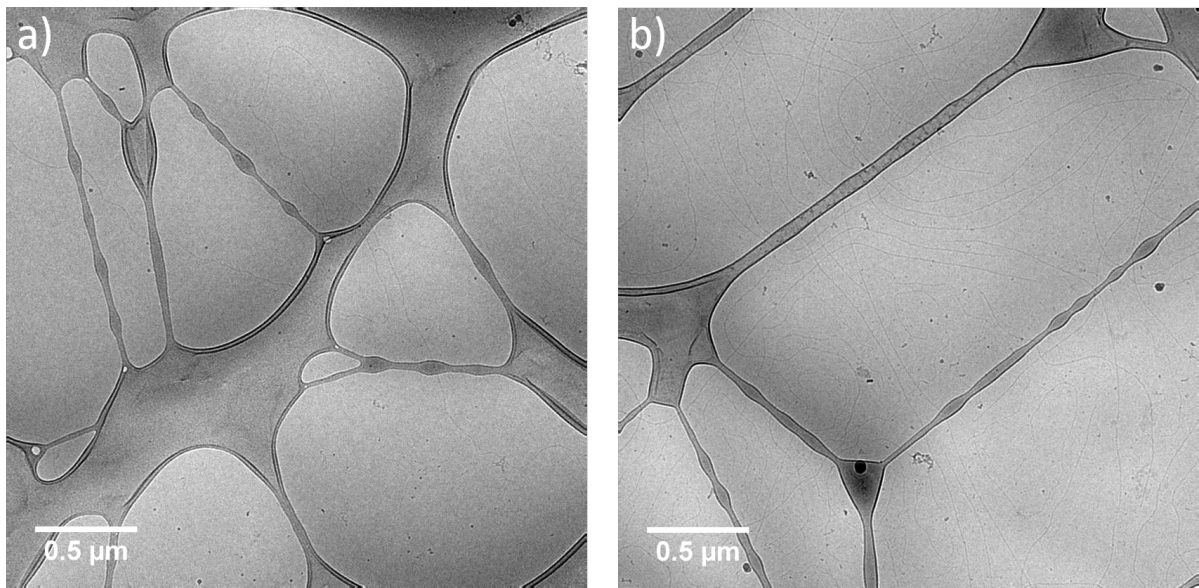

**Figure S4.** CryoTEM of **BTA-OEG<sub>4</sub>** (a) and **BTA-OEG<sub>4</sub>** incubated with BSA (b). The BTA concentration is 250  $\mu$ M.

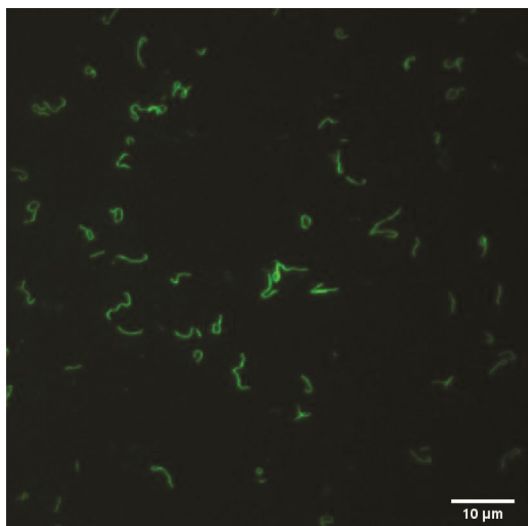

**Figure S5.** TIRF image of Cy3-BTA-OEG<sub>4</sub> in PBS.

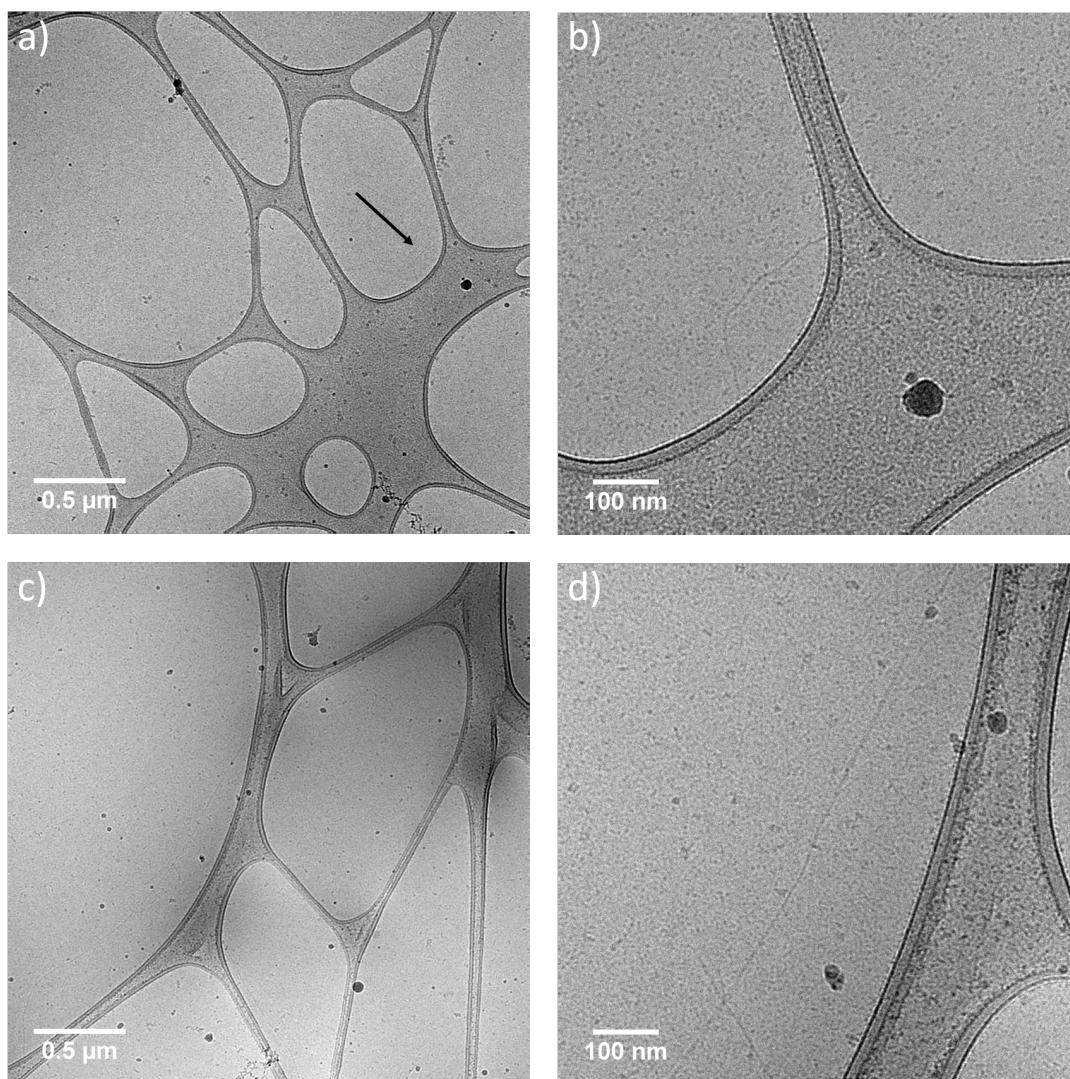

**Figure S6.** CryoTEM of BTA-OEG<sub>4</sub> in MEM (a and b) and BTA-OEG<sub>4</sub> in DMEM (c and d). The BTA concentration is 250 μM.

|                                                          | BSA + 100 BTA monomers | BSA + BTA fiber     | $\Delta$ (fiber-monomers)               |
|----------------------------------------------------------|------------------------|---------------------|-----------------------------------------|
| LJ energy <b>per-BTA monomer</b> (kcal/mol)              | $-2682.68 \pm 0.14$    | $-2684.79 \pm 0.14$ | <b>-2.11</b><br>(in favor of the fiber) |
| Total potential energy <b>per-BTA monomer</b> (kcal/mol) | $-2643.59 \pm 0.06$    | $-2645.76 \pm 0.14$ | <b>-2.17</b><br>(in favor of the fiber) |

**Table S1.** Values of the total potential energy and the Lennard Jones LJ energy in the systems (per-monomer), computed on the equilibrated phase of 400 ns of the CG-MD simulations.
